# Supplementary material
Source: PubMed Central journal article supplement (PMC2868386)
Supplement: NIHMS193703-supplement-Supplement_1.pdf [file NIHMS193703-supplement-Supplement_1.pdf]

## Supplementary information | S1

## Author addresses

**Giorgio A. Ascoli**

Molecular Neuroscience Department and Center for Neural Informatics, Structures, and Plasticity, Krasnow Institute for Advanced Study, George Mason University, MS2A1, 4400 University Drive, Fairfax, Virginia 22030, USA.

e-mail: [ascoli@gmu.edu](mailto:ascoli@gmu.edu)

Webpage: <http://krasnow.gmu.edu/cn3>

**Lidia Alonso-Nanclares**

Functional and Systems Neurobiology, Instituto Cajal, Avda. Dr. Arce 37, Madrid 28002, Spain.

e-mail: [aidil@cajal.csic.es](mailto:aidil@cajal.csic.es)

Webpage: <http://www.cajal.csic.es/index.php?serviceAmpliarGrupoDeTrabajo&id=52&idd=2&pn=lineasInvestigacion>

**Stewart A Anderson**

Weill Cornell medical college, 1300 York Ave, New York, New York 10065, USA.

e-mail: [saa2007@med.cornell.edu](mailto:saa2007@med.cornell.edu)

Webpage: <http://www.med.cornell.edu/research/saanderson/index.html>

**German Barrionuevo**

University of Pittsburgh, 210 Langley Hall, Fifth Avenue and Ruskin, Pennsylvania 15260, USA.

e-mail: [german@pitt.edu](mailto:german@pitt.edu)

Webpage: <http://www.pitt.edu/~german/>

**Ruth Benavides-Piccione**

Instituto Cajal, Avda. Dr. Arce 37, 28002 Madrid, Spain.

e-mail: [rpb@cajal.csic.es](mailto:rpb@cajal.csic.es)

**Andreas Burkhalter**

Department of Anatomy and Neurobiology, 8108, Washington University School of Medicine, 660 South Euclid Avenue, St. Louis, Missouri 63110, USA.

e-mail: [burkhala@pcg.wustl.edu](mailto:burkhala@pcg.wustl.edu)

Webpage: <http://neuroscience.wustl.edu>

**György Buzsáki**

Center for Molecular and Behavioral Neuroscience, Rutgers University, 197 University Avenue, Newark, New Jersey 07102, USA.

e-mail: [buzsaki@axon.rutgers.edu](mailto:buzsaki@axon.rutgers.edu)

Webpage: <http://osiris.rutgers.edu>

**Bruno Cauli**

Laboratoire de Neurobiologie des Processus Adaptatifs, CNRS UMR 7102, University Pierre and Marie Curie, 9 Quai St Bernard, 75 005 Paris, France.

email: [bruno.cauli@snv.jussieu.fr](mailto:bruno.cauli@snv.jussieu.fr)

Webpage: [http://npa.snv.jussieu.fr/index\\_en.htm](http://npa.snv.jussieu.fr/index_en.htm)

**Javier DeFelipe**

Instituto Cajal, Ave. Dr. Arce 37, 28002 Madrid, Spain.

e-mail: [defelipe@cajal.csic.es](mailto:defelipe@cajal.csic.es)

**Alfonso Fairén**

Developmental Neurobiology Department, Instituto de Neurociencias de Alicante, Universidad Miguel Hernández, Ave. Ramón y Cajal sn, 03550 San Juan de Alicante, Spain.

e-mail: [fairen@umh.es](mailto:fairen@umh.es)

Webpage: <http://in.umh.es/?page=personalsg&key=18>

**Dirk Feldmeyer**

Research Centre Juelich, Institute of Neuroscience and Biophysics, INB-3 Medicine, Cellular Neurobiology - Physiology Group, Leo-Brandt-Strasse, D-52425 Juelich, Germany.

e-mail: [d.feldmeyer@fz-juelich.de](mailto:d.feldmeyer@fz-juelich.de)

and:

RWTH Aachen University, Dept. of Psychiatry and Psychotherapy, Pauwelsstr. 30, D-52074 Aachen, Germany.

**Gord Fishell,**

Smilow Neuroscience Program, NYU School of Medicine, 522 1st Avenue New York, New York 10016, USA.

Webpage: <http://saturn.med.nyu.edu/research/dg/fishelllab/>

**Yves Frégnac**

UNIC (Department of Integrative and Computational Neuroscience), CNRS, 1 Avenue de la Terrasse, 91 198, Gif-sur-Yvette, France.

e-mail: [fregnac@unic.cnrs-gif.fr](mailto:fregnac@unic.cnrs-gif.fr)

Webpage: <http://www.unic.cnrs-gif.fr>

**Tamas F. Freund**

Institute of Experimental Medicine, Hungarian Academy of Sciences, Budapest, PO Box 67, H-1450 Hungary.

e-mail: [freund@koki.hu](mailto:freund@koki.hu)

**Daniel Gardner**

Department of Physiology & Biophysics, Head, Laboratory of Neuroinformatics D-404, Weill Medical College of Cornell University, 1300 York Avenue, New York, New York 10021, USA.

e-mail: [dan@med.cornell.edu](mailto:dan@med.cornell.edu)

Webpage: <http://neurodatabase.org>

**Esther P. Gardner**

Department of Physiology and Neuroscience, NYU School of Medicine, 550 First Avenue, New York, New York 10016, USA.

e-mail: [esther.gardner@nyumc.org](mailto:esther.gardner@nyumc.org)

**Jesse H Goldberg**

McGovern Institute for Brain Research, Massachusetts Institute of Technology, 32 Vassar Street, Cambridge, Massachusetts 02139, USA.

e-mail: [jesseg1@mit.edu](mailto:jesseg1@mit.edu)

**Moritz Helmstaedter**

Cell Physiology, Max Planck Institute for Medical Research, Jahnstr. 29, D-69120 Heidelberg, Germany.

e-mail: [moritz.helmstaedter@mpimf-heidelberg.mpg.de](mailto:moritz.helmstaedter@mpimf-heidelberg.mpg.de)

**Shaul Hestrin**

Stanford University, 300 Pasteur Drive, Stanford, California 94305-5342, USA.

e-mail: [shestrin@stanford.edu](mailto:shestrin@stanford.edu)

**Fuyuki Karube**

Department of anatomy, histology, and embryology, University of Debrecen, Nagyerdei krt. 98, 4032 Debrecen, Hungary.

e-mail: [fuyuki@chondron.anat.dote.hu](mailto:fuyuki@chondron.anat.dote.hu)

**Zoltán F. Kivárdy**

Laboratory for Cortical Systems Neuroscience, University of Debrecen, Department of Anatomy, Histology and Embryology, Nagyerdei krt 98, 4032 Debrecen, Hungary.

e-mail: [kisvarday@chondron.anat.dote.hu](mailto:kisvarday@chondron.anat.dote.hu)

## SUPPLEMENTARY INFORMATION

### **Bertrand Lambolez**

NPA CNRS UMR 7102, UPMC Univ Paris 6, 9 quai St Bernard, 75005, Paris, France.

e-mail: [bertrand.lambolez@snv.jussieu.fr](mailto:bertrand.lambolez@snv.jussieu.fr)

Webpage: <http://npa.snv.jussieu.fr/eq/team.php?eq=rccn&lang=en>

### **David A. Lewis**

Departments of Psychiatry and Neuroscience, University of Pittsburgh, W1651 Biomedical Science Tower, 3811 O'Hara Street, Pittsburgh, Pennsylvania 15213, USA.

e-mail: [lewisda@upmc.edu](mailto:lewisda@upmc.edu)

Webpage: <http://www.tnp.pitt.edu>

### **Oscar Marín**

Instituto de Neurociencias de Alicante, Consejo Superior de Investigaciones Científicas and Universidad Miguel Hernández, Av. Ramón y Cajal, s/n, Campus de San Juan, 03550 Sant Joan, d'Alacant, Spain.

e-mail: [o.marin@umh.es](mailto:o.marin@umh.es)

Webpage: <http://in.umh.es/marinlab/>

### **Henry Markram**

EPFL - Ecublens, Office: AAB 118, SV-BMI-LNMC AAB 1 18, Station 15, CH-1015 Lausanne, Switzerland.

e-mail: [henry.markram@epfl.ch](mailto:henry.markram@epfl.ch)

### **Alberto Muñoz**

Instituto Cajal (CSIC), Ave. Dr. Arce, 37, 28002 Madrid, Spain.

e-mail: [ephaptek@googlemail.com](mailto:ephaptek@googlemail.com)

### **Adam Packer**

Department of Biological Sciences, Columbia University, 1212 Amsterdam Avenue, MC 2436, New York, New York 10027, USA.

e-mail: [adampacker@columbia.edu](mailto:adampacker@columbia.edu)

### **Carl Christian Holger Petersen**

Laboratory of Sensory Processing, Ecole Polytechnique Federale de Lausanne (EPFL), Brain Mind Institute, Faculty of Life Science, SV-BMI-LSSENS, Station 15, Ecole Polytechnique Federale de Lausanne (EPFL), Lausanne, Switzerland.

e-mail: [carl.petersen@epfl.ch](mailto:carl.petersen@epfl.ch)

Webpage: <http://lsens.epfl.ch/>

### **Kathleen S. Rockland**

Brain Science Institute, RIKEN, 2-1 Hirosawa, Wako-shi, Saitama 351-0198, Japan.

e-mail: [rockland@brain.riken.jp](mailto:rockland@brain.riken.jp)

Webpage: <http://www.brain.riken.jp/labs/cos/>

### **Jean Rossier**

Ecole Supérieure de Physique et de Chimie Industrielles, 10, rue Vauquelin, 75005 Paris 5, France.

e-mail: [jean.rossier@espci.fr](mailto:jean.rossier@espci.fr)

Webpage: [http://www.bio.espci.fr/fr/perso/rossier/index\\_en.html](http://www.bio.espci.fr/fr/perso/rossier/index_en.html)

### **Bernardo Rudy**

Smilow Neuroscience Program/ Department of Physiology & Neuroscience, New York University School of Medicine, Smilow Research Building 6 605, 522 First Avenue, New York, New York 10016, USA.

e-mail: [Rudyb01@med.nyu.edu](mailto:Rudyb01@med.nyu.edu)

Webpage: <http://www.med.nyu.edu/people/B.Rudy.html>

### **Peter Somogyi**

MRC Anatomical Neuropharmacology Unit, Department of Pharmacology, The University of Oxford, Mansfield Rd., Oxford, OX3 7TN, UK.

e-mail: [peter.somogyi@pharm.ox.ac.uk](mailto:peter.somogyi@pharm.ox.ac.uk)

Webpage: <http://mrcanu.pharm.ox.ac.uk>

### **Jochen Staiger, MD**

Albert-Ludwigs-University Freiburg, Institute for Anatomy and Cell Biology, Department of Neuroanatomy & Center for Neurosciences, Albertstrasse 23, D-79104 Freiburg, Germany.

Webpage: <http://www.barrels.uni-freiburg.de/>

### **Gabor Tamas**

HAS Research Group for Cortical Microcircuits, Department of Physiology, Anatomy and Neuroscience, University of Szeged, Közép fasor 52, Szeged, H-6726, Hungary.

e-mail: [gtamas@bio.u-szeged.hu](mailto:gtamas@bio.u-szeged.hu)

### **Alex M. Thomson**

The School of Pharmacy, University of London, 29-39 Brunswick Square, London, UK.

e-mail: [alex.thomson@pharmacy.ac.uk](mailto:alex.thomson@pharmacy.ac.uk)

Webpage: [http://www.pharmacy.ac.uk/alex\\_thomson.html](http://www.pharmacy.ac.uk/alex_thomson.html)

### **Maria Toledo-Rodriguez**

Brain & Body Centre, University of Nottingham, Psychology Building, University Park, Nottingham, NG7 2RD, UK.

e-mail: [maria.toledo@nottingham.ac.uk](mailto:maria.toledo@nottingham.ac.uk)

Webpage: <http://www.brainbody.nottingham.ac.uk/people/maria.php>

### **Yun Wang**

Department of Neurology, Caritas St. Elizabeth's Medical Center, Tufts School of Medicine, 736 Cambridge St., Boston, Massachusetts 02135, USA.

e-mail: [yun.wang@tufts.edu](mailto:yun.wang@tufts.edu)

### **David Coppen West**

Library and Information Services, The School of Pharmacy, 29-39 Brunswick Square.

e-mail: [david.west@pharmacy.ac.uk](mailto:david.west@pharmacy.ac.uk)

### **Rafael Yuste**

Department of Biological Sciences, Columbia University, 1212 Amsterdam Avenue, Box 2435, New York, New York 10027, USA.

e-mail: [rmy5@columbia.edu](mailto:rmy5@columbia.edu)

Webpage: <http://www.columbia.edu/cu/biology/faculty/yuste/index.html>
