# Supplementary material
Source: PubMed Central journal article supplement (PMC2868386)
Supplement: NIHMS193703-supplement-Supplement_3.pdf [file NIHMS193703-supplement-Supplement_3.pdf]

Supplementary information | S3

**Nomenclature of molecular features**

---

(Method used to identify these molecules should be specified)

**Transcription factors**

Nkx2.1, Dlx1, Dlx2, Lhx6, NPAS1, NPAS3, Vax1

**Neurotransmitters or their synthesizing enzymes (+/-)**

GABA, GAD, NO, nNOS, TH, ACh, ChAT

**Neuropeptides (+/-)**

SOM, VIP, NPY, CCK, TK

**Calcium binding proteins (+/-)**

PV, CR, CB

**Receptors**

*Ionotropic:* AMPA (GluR1–4); kainate (GluR5–7, KA1, KA2); NMDA (NR1, NR2A–D); GABA<sub>A</sub> ( $\alpha$ 1–6,  $\beta$ 1–3,  $\gamma$ 1–3,  $\delta$ ,  $\epsilon$ ,  $\pi$ , and  $\tau$ ); GABA<sub>C</sub> ( $\rho$ 1–3); glycine ( $\alpha$ 1– $\alpha$ 4,  $\beta$ ); nicotinic (nAChR  $\alpha$ 2– $\alpha$ 7,  $\beta$ 2– $\beta$ 4); serotonin (5-HT<sub>3</sub>).

*Metabotropic:* GABA<sub>B</sub> (1a, 1b, 2); glutamate (type I: mGluR1, mGluR5; type II: mGluR2, mGluR3; type III: mGluR4, mGluR6–8); muscarinic (M1–M5); serotonin (coupled to G<sub>o</sub>/G<sub>α</sub> proteins: 5-HT<sub>1A</sub>, 5-HT<sub>1B</sub>, 5-HT<sub>1D</sub>, 5-HT<sub>1E</sub>, 5-HT<sub>1F</sub>; coupled to G<sub>α</sub> proteins: 5-HT<sub>2A</sub>, 5-HT<sub>2B</sub>, 5-HT<sub>2C</sub>; coupled to G<sub>s</sub> proteins: 5-HT<sub>4</sub>, 5-HT<sub>6</sub>, and 5-HT<sub>7</sub>; 5-HT<sub>5</sub>; 5-HT<sub>5A</sub> and 5-HT<sub>5B</sub>); noradrenaline ( $\alpha$ 1:  $\alpha$ 1A,  $\alpha$ B,  $\alpha$ 1D;  $\alpha$ 2:  $\alpha$ 2A,  $\alpha$ 2B,  $\alpha$ 2C;  $\beta$ :  $\beta$ 1,  $\beta$ 2,  $\beta$ 3); histamine (H1–H4); dopamine (D1, D2); cannabinoid (CB1, CB2).

**Structural proteins**

**Cell surface markers (+/-)**

VVA (*Vicia villosa* agglutinin), SBA (soybean agglutinin)

**Ion channel expression (+/-)**

Kv3.1, Kv3.2, Ih (HCN1–4), I<sub>T</sub> (T type current), Ca  $\alpha$ 1, C $\alpha$ 3.1–3, Kv1.1, Kv4.2 or Kv4.3, Kv2.1, Kv2.2, SK and BK, KCNQ

**Connexins**

**Pannexins**

**Transporters**

*Plasma membrane:* GAT-1, GAT-3

*Vesicular:* VGAT, VGLUT-3
