# Supplementary material
Source: PubMed Central journal article supplement (PMC2868386)
Supplement: NIHMS193703-supplement-Supplement_4.pdf [file NIHMS193703-supplement-Supplement_4.pdf]

Supplementary information | S4

**Nomenclature of physiological features.**

**Part A**

(Experimental conditions should be specified)

*Passive/subthreshold parameters:*

- Resting membrane potential ( $V_m$ )
- Membrane time constant (fast, slow)
- Input resistance
- Subthreshold membrane potential oscillation (specify frequency)

Resonance

Rheobase

Chronaxie

Rectification

*Action potential measurements:*

Amplitude (absolute – from start of fast rising phase), threshold, half-width

AHP (amplitude from spike threshold, decay time constant, latency from spike peak to AHP peak, shape)

ADP (latency from spike peak to ADP peak)

Changes in action potential waveform during train

Dendritic backpropagation

*Depolarizing plateaus.*

*Firing pattern (specify amplitude and duration of depolarizing current):*

Oscillatory and resonant behavior

Onset response to somatic depolarizing current step

- Continuous
- Burst
- Delayed
- Single spike followed by pause in firing
- Other

Steady state response to depolarizing current step

- Amplitude accommodation
- Spike frequency adaptation (with 1 or more time constants)
- Maximal frequency at steady state (saturating frequency)
- Minimal maintained or continuous frequency at steady state
- Slope of I-f curve
- AHP accommodation
- Slow AHP after current step
- ISI distribution (irregular spiking; stuttering)
- Repetitive bursts/doublets
- Silent
- Other

*During hyperpolarizing step:*

Rectification (state size of pulse and membrane potential from which it is applied)

- Onset
- Steady state
- Sag
  - Rebound
- Hump
- Spike
- Stereotypical burst

*Spiking features recorded extracellularly:*

Phase relationship to oscillation

Functional response specificity

Cross correlation based identification

Other dynamics

**Part B**

(Methods used must be specified. If/how the presynaptic cell(s) was/were identified must be specified)

*Postsynaptic responses:* (helpful to specify EPSP/EPSC/IPSP/IPSC)

Spontaneous (these should be given as distributions since they come from many different sources)

- Rise time, amplitude, decay, reversal potential, receptors, frequency, charge

Evoked – method must be specified, including membrane potential from which they are measured

- Rise time (specify eg. 10-90% or 20-80%), amplitude distribution, decay (or width at half amplitude), reversal potential, receptors, charge

Ratio of of response amplitude/charge attributable to different receptor subtypes

Spatial and temporal summation – specify interspike interval

Gap junctions (describe the coupled cell)

- Coupling coefficient, rectification

Paired intracellular/Whole-cell recordings (identity presynaptic neuron)

Short-term plasticity

- Kinetics of synaptic facilitation, depression and post-tetanic potentiation

- Binomial parameters p, q and n (and method and conditions of measurement/assessment)

Long-term plasticity (of initial and steady state response)

- Kinetics, polarity, charge and amplitude
- Conditions required for induction and maintenance
- Mechanism(s) identified

Note: The “Short term plasticity” section should include only those data obtained with paired recordings in which the occurrence and timing of the presynaptic action potential(s) can be unambiguously identified. Whether or not tests for pre- or postsynaptic location were performed (and their outcome) should be specified.
