# Supplementary material
Source: PubMed Central journal article supplement (PMC2868386)
Supplement: NIHMS193703-supplement-Supplement_5.pdf [file NIHMS193703-supplement-Supplement_5.pdf]

Supplementary information | S5

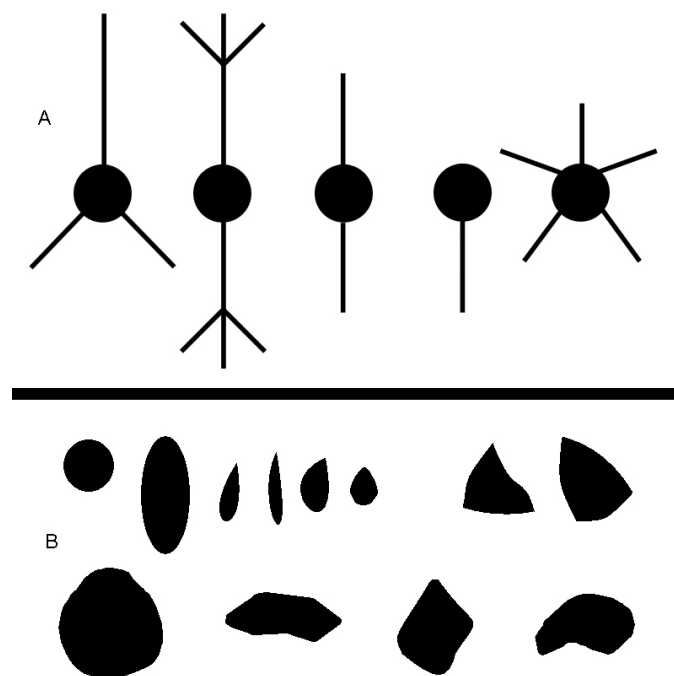

**Somato-dendritic characteristics of cortical interneurons.**  
Schematic drawings showing examples of polarity of dendritic arborization (a) and soma shape (b).
