# Supplementary material
Source: PubMed Central journal article supplement (PMC2868386)
Supplement: NIHMS193703-supplement-Supplement_6.pdf [file NIHMS193703-supplement-Supplement_6.pdf]

Supplementary information | S6

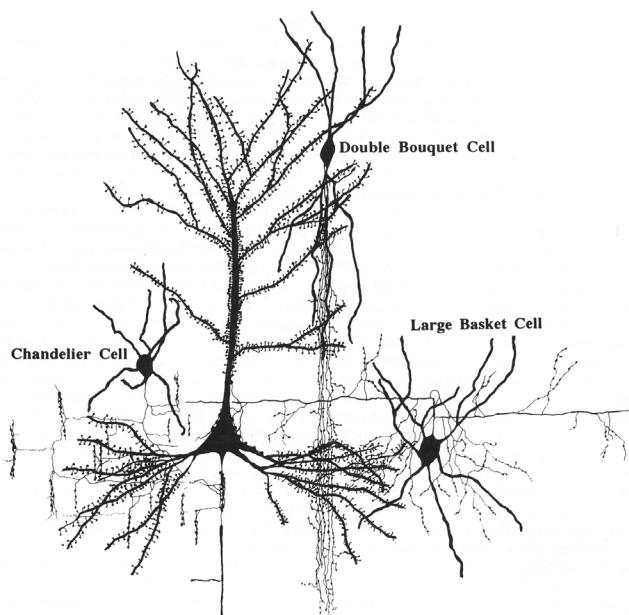

**Target specificity of cortical interneurons.** Drawing illustrating the synaptic relationships between double bouquet cells, chandelier cells and large basket cells with pyramidal cells. Reproduced, with permission, from REF. 1 © (1992) Pergammon Press.

1. DeFelipe, J. & Fariñas, I. The pyramidal neuron of the cerebral cortex: morphological and chemical characteristics of the synaptic inputs. *Prog. Neurobiol.* **39**, 563–607 (1992).
