# Supplementary material
Source: PubMed Central journal article supplement (PMC2868386)
Supplement: NIHMS193703-supplement-Supplement_10.pdf [file NIHMS193703-supplement-Supplement_10.pdf]

Supplementary information | S10

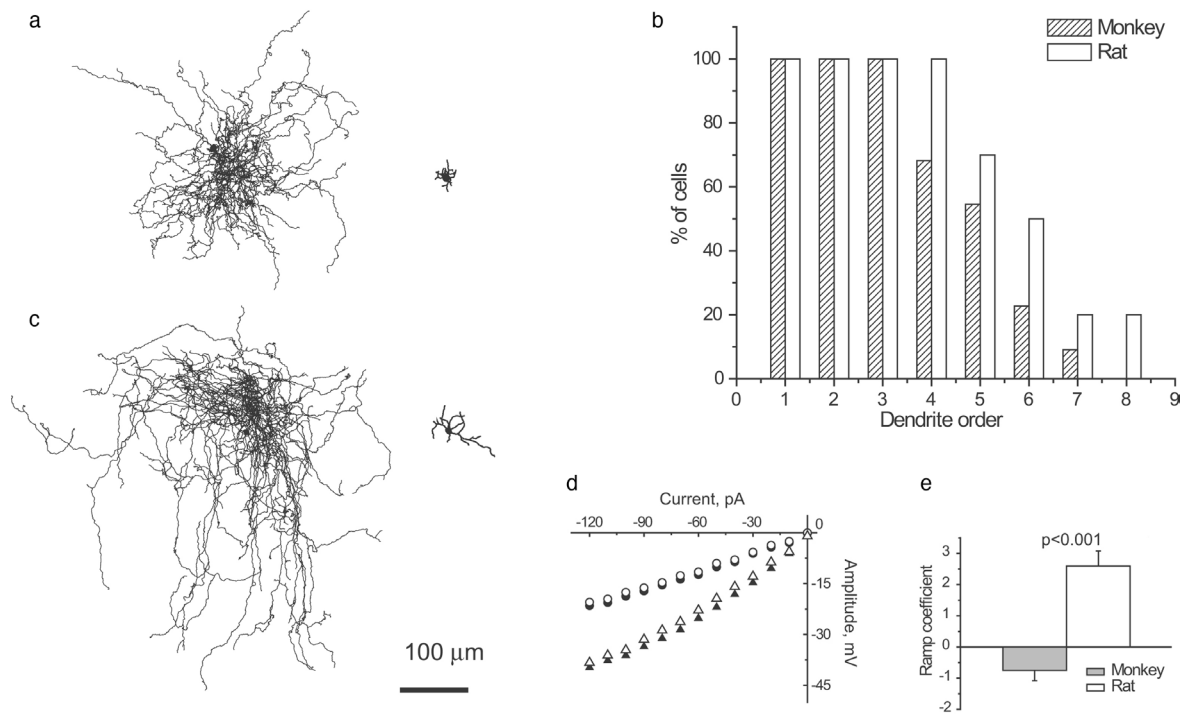

**Differences between species: prefrontal cortex neurogliaform (NGF) cells. a,b** | Additional examples of the axonal and dendritic patterns in the monkey (a) and rat (b). **c** | Percentage of cells with the dendrites of different orders in monkey (n=22) and rat (n=9). Dendrites tended to branch less in monkey than in rat. **d** | Current-voltage plots for traces shown in FIG. 6E in the main text. **e** | The ramp coefficient was larger in rat NGF cells (n=19) than in monkey (n=22). Error bars represent SE.
